# Supplementary material for: The Classification of Q1 SJR-Ranked Library and Information Science Journals by an AI-driven “Suspected Predatory” Journal Classifier
Source: publisher site journal article supplement (doi:10.1515/opis-2022-0150), 2023-01-01
Supplement: Supplementary file 2 [file opis-2022-0150_sm.xlsx]

## Sheet: 2 June 2023
Rank (SJR) 2022	Journal title	Publisher	URL	SPJ/NJ classification (Chen et al. 2023)
1	International Journal of Information Management	Elsevier	https://www.sciencedirect.com/journal/international-journal-of-information-management	NJ
2	Information Systems Research	INFORMS (The Institute for Operations Research and the Management Sciences)	https://pubsonline.informs.org/journal/isre	NJ
3	European Journal of Information Systems	Taylor & Francis	https://www.tandfonline.com/journals/tjis20	NJ
4	International Journal of Information Management Data Insights	Elsevier	https://www.sciencedirect.com/journal/international-journal-of-information-management-data-insights	NJ
5	Scientific Data	Springer Nature	https://www.nature.com/sdata/	NJ
6	Big Data and Society	SAGE	https://journals.sagepub.com/home/bds	NJ
7	Government Information Quarterly	Elsevier	https://www.sciencedirect.com/journal/government-information-quarterly	SPJ
8	Information Processing & Management	Elsevier	https://www.sciencedirect.com/journal/information-processing-and-management	NJ
9	Information and Organization	Elsevier	https://www.sciencedirect.com/journal/information-and-organization	NJ
10	IEEE Transactions on Information Theory	IEEE	https://ieeexplore.ieee.org/xpl/RecentIssue.jsp?punumber=18	NJ
11	Information, Communication & Society	Taylor & Francis	https://www.tandfonline.com/journals/rics20	SPJ
12	Social Science Computer Review	SAGE	https://journals.sagepub.com/home/ssc	SPJ
13	Journal of Cheminformatics	BMC (Springer Nature)	https://jcheminf.biomedcentral.com/	NJ
14	Quantitative Science Studies	MIT Press	https://direct.mit.edu/qss	NJ
15	Journal of Information Technology	SAGE	https://journals.sagepub.com/home/jin	SPJ
16	Journal of Chemical Information and Modeling	ACS (American Chemical Society)	https://pubs.acs.org/journal/jcisd8	NJ
17	International Journal of Geographical Information Science	Taylor & Francis	https://www.tandfonline.com/journals/tgis20	SPJ
18	Journal of Informetrics	Elsevier	https://www.sciencedirect.com/journal/journal-of-informetrics	NJ
19	Education and Information Technologies	Springer Nature	https://www.springer.com/journal/10639	NJ
20	Journal of Enterprise Information Management	Emerald Publishing	https://www.emerald.com/insight/publication/issn/1741-0398	NJ
21	Telecommunications Policy	Elsevier	https://www.sciencedirect.com/journal/telecommunications-policy	NJ
22	Information Systems Management	Taylor & Francis	https://www.tandfonline.com/journals/uism20	SPJ
23	Information Technology and People	Emerald Publishing	https://www.emeraldgrouppublishing.com/journal/itp	SPJ
24	Medical Reference Services Quarterly	Taylor & Francis	https://www.tandfonline.com/journals/wmrs20	SPJ
25	Journal of Health Communication	Taylor & Francis	https://www.tandfonline.com/journals/uhcm20	SPJ
26	Scientometrics	Springer Nature	https://www.springer.com/journal/11192	NJ
27	Journal of the Association for Information Science and Technology	Wiley	https://asistdl.onlinelibrary.wiley.com/journal/23301643	NJ
28	Research Evaluation	Oxford University Press	https://academic.oup.com/rev	NJ
29	College and Research Libraries	ACRL (Association of College and Research Libraries)	https://crl.acrl.org/index.php/crl	SPJ
30	Information and Learning Science	Emerald Publishing	https://www.emerald.com/insight/publication/issn/2398-5348	NJ
31	Health Information and Libraries Journal	Wiley	https://onlinelibrary.wiley.com/journal/14711842	SPJ
32	Data Intelligence	MIT Press	https://direct.mit.edu/dint	NJ
33	Journal of Academic Librarianship	Elsevier	https://www.sciencedirect.com/journal/the-journal-of-academic-librarianship	SPJ
34	Ethics and Information Technology	Springer Nature	https://www.springer.com/journal/10676	NJ
35	Profesional de la Información	EPI SCP	http://profesionaldelainformacion.com/index.html	SPJ
36	Journal of Documentation	Emerald Publishing	https://www.emerald.com/insight/publication/issn/0022-0418	NJ
37	Communications in Information Literacy	Independent	https://pdxscholar.library.pdx.edu/comminfolit/	SPJ
38	Journal of the Medical Library Association : JMLA	MLA	https://jmla.mlanet.org/ojs/jmla	NJ
39	The Bottom Line	Emerald Publishing	https://www.emeraldgrouppublishing.com/journal/bl	SPJ
40	Library and Information Science Research	Elsevier	https://www.sciencedirect.com/journal/library-and-information-science-research	NJ
41	International Journal of Multimedia Information Retrieval	Springer Nature	https://www.springer.com/journal/13735	NJ
42	Learned Publishing	Wiley	https://onlinelibrary.wiley.com/journal/17414857	SPJ
43	Online Information Review	Emerald Publishing	https://www.emerald.com/insight/publication/issn/1468-4527	NJ
44	Journal of Library and Information Services in Distance Learning	Taylor & Francis	https://www.tandfonline.com/journals/wlis20	NJ
45	Digital Library Perspectives	Emerald Publishing	https://www.emerald.com/insight/publication/issn/2059-5816	NJ
46	Journal of Librarianship and Information Science	SAGE	https://journals.sagepub.com/home/lis	NJ
47	Accountability in Research	Taylor & Francis	https://www.tandfonline.com/journals/gacr20	SPJ
48	Journal of Library Administration	Taylor & Francis	https://www.tandfonline.com/journals/wjla20	SPJ
49	Knowledge Management Research and Practice	Taylor & Francis	https://www.tandfonline.com/journals/tkmr20	SPJ
50	World Patent Information	Elsevier	https://www.sciencedirect.com/journal/world-patent-information	NJ
51	Portal	John Hopkins University Press	https://www.press.jhu.edu/journals/portal-libraries-and-academy	NJ
52	Publications	MDPI	https://www.mdpi.com/journal/publications	NJ
53	Personal and Ubiquitous Computing	Springer Nature	https://www.springer.com/journal/779	NJ
54	Journal of Classification	Springer Nature	https://www.springer.com/journal/357	NJ
55	Information Retrieval	Springer Nature	https://www.springer.com/journal/10791	NJ
56	Information Technology and Libraries	American Library Association	https://ejournals.bc.edu/index.php/ital/index	SPJ
57	The Reference Librarian	Taylor & Francis	https://www.tandfonline.com/journals/wref20	SPJ
58	Public Library Quarterly	Taylor & Francis	https://www.tandfonline.com/journals/wplq20	SPJ
59	Journal of Decision Systems	Taylor & Francis	https://www.tandfonline.com/journals/tjds20	SPJ
60	New Review of Academic Librarianship	Taylor & Francis	https://www.tandfonline.com/journals/racl20	SPJ
61	Journal of the Australian Library and Information Association	Taylor & Francis	https://www.tandfonline.com/journals/ualj21	SPJ
62	Journal of Information Science	SAGE	https://journals.sagepub.com/home/jis	SPJ
63	VINE Journal of Information and Knowledge Management Systems	Emerald Publishing	https://www.emerald.com/insight/publication/issn/2059-5891	NJ
64	Information Development	SAGE	https://journals.sagepub.com/home/idv	SPJ

## Sheet: March to June 2023 changes
March 2023 ranks				June 2023 ranks
1	International Journal of Information Management	SPJ		1	International Journal of Information Management	NJ
2	Information Systems Research	SPJ		2	Information Systems Research	NJ
3	Information and Organization	SPJ		3	European Journal of Information Systems	NJ
4	Scientific Data	SPJ		4	International Journal of Information Management Data Insights	NJ
5	Government Information Quarterly	SPJ		5	Scientific Data	NJ
6	Journal of Information Technology	SPJ		6	Big Data and Society	NJ
7	European Journal of Information Systems	NJ		7	Government Information Quarterly	SPJ
8	Big Data and Society	SPJ		8	Information Processing & Management	NJ
9	Information, Communication & Society	NJ		9	Information and Organization	NJ
10	Information Processing & Management	SPJ		10	IEEE Transactions on Information Theory	NJ
11	IEEE Transactions on Information Theory	SPJ		11	Information, Communication & Society	SPJ
12	Journal of Cheminformatics	NJ		12	Social Science Computer Review	SPJ
13	Social Science Computer Review	SPJ		13	Journal of Cheminformatics	NJ
14	Journal of Informetrics	SPJ		14	Quantitative Science Studies	NJ
15	Ethics and Information Technology	SPJ		15	Journal of Information Technology	SPJ
16	Journal of Chemical Information and Modeling	SPJ		16	Journal of Chemical Information and Modeling	NJ
17	Telecommunications Policy	SPJ		17	International Journal of Geographical Information Science	SPJ
18	International Journal of Multimedia Information Retrieval	SPJ		18	Journal of Informetrics	NJ
19	International Journal of Geographical Information Science	NJ		19	Education and Information Technologies	NJ
20	College and Research Libraries	NJ		20	Journal of Enterprise Information Management	NJ
21	Information Technology and People	SPJ		21	Telecommunications Policy	NJ
22	Education and Information Technologies	SPJ		22	Information Systems Management	SPJ
23	Journal of Enterprise Information Management	SPJ		23	Information Technology and People	SPJ
24	Scientometrics	SPJ		24	Medical Reference Services Quarterly	SPJ
25	Library and Information Science Research	SPJ		25	Journal of Health Communication	SPJ
26	Computers in the Schools	NJ		26	Scientometrics	NJ
27	Journal of the Medical Library Association : JMLA	NJ		27	Journal of the Association for Information Science and Technology	NJ
28	Journal of Health Communication	NJ		28	Research Evaluation	NJ
29	Education for Information	NJ		29	College and Research Libraries	SPJ
30	Health Information and Libraries Journal	SPJ		30	Information and Learning Science	NJ
31	Journal of the Association for Information Science and Technology	SPJ		31	Health Information and Libraries Journal	SPJ
32	Journal of Web Librarianship	NJ		32	Data Intelligence	NJ
33	Profesional de la Información	NJ		33	Journal of Academic Librarianship	SPJ
34	Information Systems Management	NJ		34	Ethics and Information Technology	NJ
35	Research Evaluation	NJ		35	Profesional de la Información	SPJ
36	Information Retrieval	NJ		36	Journal of Documentation	NJ
37	Journal of Information Science	SPJ		37	Communications in Information Literacy	SPJ
38	Journal of Librarianship and Information Science	SPJ		38	Journal of the Medical Library Association : JMLA	NJ
39	Journal of Academic Librarianship	SPJ		39	The Bottom Line	SPJ
40	Reference Services Review	SPJ		40	Library and Information Science Research	NJ
41	Journal of Library and Information Services in Distance Learning	NJ		41	International Journal of Multimedia Information Retrieval	NJ
42	Archival Science	NJ		42	Learned Publishing	SPJ
43	Information and Learning Science	NJ		43	Online Information Review	NJ
44	Library Quarterly	SPJ		44	Journal of Library and Information Services in Distance Learning	NJ
45	Journal of Library Administration	NJ		45	Digital Library Perspectives	NJ
46	Journal of Documentation	NJ		46	Journal of Librarianship and Information Science	NJ
47	Online Information Review	NJ		47	Accountability in Research	SPJ
48	Personal and Ubiquitous Computing	NJ		48	Journal of Library Administration	SPJ
49	Medical Reference Services Quarterly	NJ		49	Knowledge Management Research and Practice	SPJ
50	Portal	NJ		50	World Patent Information	NJ
				51	Portal	NJ
				52	Publications	NJ
				53	Personal and Ubiquitous Computing	NJ
				54	Journal of Classification	NJ
				55	Information Retrieval	NJ
				56	Information Technology and Libraries	SPJ
				57	The Reference Librarian	SPJ
				58	Public Library Quarterly	SPJ
				59	Journal of Decision Systems	SPJ
				60	New Review of Academic Librarianship	SPJ
				61	Journal of the Australian Library and Information Association	SPJ
				62	Journal of Information Science	SPJ
				63	VINE Journal of Information and Knowledge Management Systems	NJ
				64	Information Development	SPJ
